# Supplementary material
Source: MDPI journal article supplement (https://www.mdpi.com/2227-7390/10/4/562)
Supplement: s1 [file s1]

Archive with 1 entries (1 files):
- mathematics-1538007-SI.pdf
